# Supplementary material for: Tensions between depth and breadth: an exploratory investigation of chemistry assistant professors’ perspectives on content coverage
Source: Royal Society of Chemistry journal article supplement (doi:10.1039/d2rp00299j), 2022-12-23
Supplement: d2rp00299j1.pdf [file d2rp00299j1.pdf]

## Appendices

**Table S1** – Initial codebook

| Indicated perspective | Description of reasoning                                                                                                                                                                                                                                                                                                                                                                                                                                                                                                                                                                                                                                                 |
|-----------------------|--------------------------------------------------------------------------------------------------------------------------------------------------------------------------------------------------------------------------------------------------------------------------------------------------------------------------------------------------------------------------------------------------------------------------------------------------------------------------------------------------------------------------------------------------------------------------------------------------------------------------------------------------------------------------|
| Breadth               | Particular course restraint with mixture of students – wanting to provide a proper foundation for students who will work in the field                                                                                                                                                                                                                                                                                                                                                                                                                                                                                                                                    |
| It Depends            | Context dependent (course level undergraduate or graduate)                                                                                                                                                                                                                                                                                                                                                                                                                                                                                                                                                                                                               |
| Depth                 | <p>Concern for students' future</p> <ul style="list-style-type: none"> <li>-Focus on foundations for students to apply in future</li> <li>-Breadth focus sets students up for failure</li> </ul> <p>Student learning is instructor responsibility</p> <p>Concern for students' learning</p> <ul style="list-style-type: none"> <li>-Need to balance student level of understanding "poor" vs. "strong"</li> <li>-Don't want to overwhelm students, leaving them feeling lost/didn't learn anything</li> </ul> <p>Constraints on content coverage (Culture of department/institution)</p> <p>Feeling uneasy about leaving students behind</p> <p>No clear explanation</p> |

**Table S2** – Chemistry assistant professors' perspectives on content coverage

| Perspective on content coverage              | Participants, <i>n</i> | Subject and course level taught                                                                                                       |
|----------------------------------------------|------------------------|---------------------------------------------------------------------------------------------------------------------------------------|
| Depth is more important than breadth         | 4                      | Bioanalytical - Graduate<br>Inorganic – Lower Undergraduate<br>Analytical – Lower Undergraduate<br>Biochemistry - Upper Undergraduate |
| Theoretically depth, but in practice breadth | 3                      | Biochemistry - Upper Undergraduate<br>Organic – Lower Undergraduate<br>Analytical - Upper Undergraduate                               |
| Breadth is more important than depth         | 1                      | General Chemistry – Lower Undergraduate                                                                                               |
| It depends                                   | 1                      | Biochemistry - Upper Undergraduate                                                                                                    |

**Table S3** – Final codebook section on factors and reasoning behind faculty’s perspectives on the depth-breadth spectrum

| Type of factor          | Source of reasoning                                                                                                   | Description of reasoning                                                                                                      |
|-------------------------|-----------------------------------------------------------------------------------------------------------------------|-------------------------------------------------------------------------------------------------------------------------------|
| Individual              | Conception of Breadth                                                                                                 | Students will get bored if covering a minority of topics therefore need to cover topics quickly                               |
|                         | Conception of Depth                                                                                                   | Focus on core/foundational topics                                                                                             |
|                         |                                                                                                                       | Students get lost in breadth coverage without depth, therefore there is no point to it                                        |
|                         |                                                                                                                       | Application of core/foundation material                                                                                       |
|                         |                                                                                                                       | Adjusted pace based on students not the syllabus/schedule                                                                     |
|                         |                                                                                                                       | Emphasis on application of material                                                                                           |
| Personal considerations | Focus on why content is important                                                                                     |                                                                                                                               |
|                         | Reflected on their own learning, how they were taught, or observation of others teaching of the subject               |                                                                                                                               |
|                         | Felt need to add introductions to additional content to prepare students for research in graduate school/their career |                                                                                                                               |
| Contextual              | External Pressure                                                                                                     | Expressed tension in what the instructor wants students to understand versus the content the instructor anticipated to cover  |
|                         |                                                                                                                       | Syllabus dictates the content that has to be covered                                                                          |
|                         |                                                                                                                       | Felt expectation of content coverage based on course series (ex. Gen Chem 1 & 2)                                              |
|                         | Department                                                                                                            | Expectation of content coverage in course based on textbook chapters and/or instructor relies on textbook for pace of content |
|                         |                                                                                                                       | Have to cover what is on the ACS exam                                                                                         |
|                         |                                                                                                                       | Felt pressure from senior colleagues to cover topics                                                                          |
| Course Level            | Perspective varied between course level taught (i.e. undergraduate vs. graduate)                                      |                                                                                                                               |
| Structure of Course     | Aimed for alignment of content between lecture and lab                                                                |                                                                                                                               |
|                         |                                                                                                                       | Shared schedule and exams for all sections of course                                                                          |

**Table S4** – Representative quotes for chemistry assistant professors’ reasoning that supports their perspective on content coverage

| Source of reasoning     | Description of reasoning                                                                                | Quote                                                                                                                                                                                                                                                                                                                                                                                                                                                                                                   |
|-------------------------|---------------------------------------------------------------------------------------------------------|---------------------------------------------------------------------------------------------------------------------------------------------------------------------------------------------------------------------------------------------------------------------------------------------------------------------------------------------------------------------------------------------------------------------------------------------------------------------------------------------------------|
| Conception of Breadth   | Students will get bored if covering a minority of topics therefore need to cover topics quickly         | “I think also that instructors tend to think that they are very useful when lecturing, but I don't think that that's true. I think that students tend to learn what they need to from the books and from each other. And so covering the topics quickly is better because most of the students will get bored if you are covering a minority of topics I guess.” 16208                                                                                                                                  |
|                         | Focus on core/foundational topics                                                                       | “Well, so particularly for this class, a lot of the topics we cover is, as I already mentioned, some of them are an extension of Gen chem, but a lot of the other topics are things that they will need to move into their future classes and be successful. Um, and so even if we cover less, making sure that they have a very firm understanding of those topics should assist them as they move into their more, um, like their higher level chemistry courses.” 16205                              |
| Conception of Depth     | Students get lost in breadth coverage without depth, therefore there is no point to it                  | “The first one would be worse [ <i>scenario</i> ]. if we're just throwing, you know, flying through the material, but nobody's getting it, we're not teaching.” 16209                                                                                                                                                                                                                                                                                                                                   |
|                         | Application of core/foundation material                                                                 | “These ideas like equilibrium activity, acid base chemistry because they are so prominent in the rest of the curriculum as well that I think it's extremely important that they have a good foundation in them. So they may have gotten a brief intro in gen chem, but they really need to be able to utilize these concepts, these ideas both in my class and as they take things like biochem, organic chemistry, et cetera.” 16205                                                                   |
|                         | Adjusted pace based on students not the syllabus/schedule                                               | “I will say my schedule was pretty broad. It was like week one slash two this topic, week three slash four this topic ... I probably kept to it reasonably well though I did get behind at the end of the semester again, because I saw that there was challenges, understanding certain equilibrium topics that I wanted to make sure we're clear.”16205                                                                                                                                               |
|                         | Emphasis on application of material                                                                     | “We still think the learning, especially for a graduate level course, for learning it should be have a function or application. If you just learn the knowledge but without using it, I think it's useless.” 16201                                                                                                                                                                                                                                                                                      |
|                         | Focus on why content is important                                                                       | “I'm trying to fit in with what we decided the core curriculum should be, but then also to connect not only to, like I said, organic chemistry, but also other, um, I think topics to help students understand why metabolism is important to learn about or why it might be interesting to their day to day life, things like that.” 16204                                                                                                                                                             |
| Personal considerations | Reflected on their own learning, how they were taught, or observation of others teaching of the subject | “So I think I reflect on probably how I was taught those subjects or classes that I've observed, how they were taught there. And I'm trying to reflect on that. And then since this class is the third time I've taught it, I also have taken, you know, notes every semester and try to reflect on things that worked, things that didn't work and trying to continually update and refine things. Um, so that, I think that we're continuing to hopefully improve the course for the students.” 16204 |

| Source of reasoning | Description of reasoning                                                                                                      | Quote                                                                                                                                                                                                                                                                                                                                                                                                                                                                                                                                                                                                                                                        |
|---------------------|-------------------------------------------------------------------------------------------------------------------------------|--------------------------------------------------------------------------------------------------------------------------------------------------------------------------------------------------------------------------------------------------------------------------------------------------------------------------------------------------------------------------------------------------------------------------------------------------------------------------------------------------------------------------------------------------------------------------------------------------------------------------------------------------------------|
|                     | Felt need to add introductions to additional content to prepare students for research in graduate school/their career         | "I still try to stick to, you know, we have this textbook that we use, um, [inaudible] finish the first 14 chapters because it's the first semester to second semester, right. So it's pretty much determined by, the scope the class that the school defines, but I try to incorporate um, some new stuff in there as well." 16220                                                                                                                                                                                                                                                                                                                          |
|                     | Expressed tension in what the instructor wants students to understand versus the content the instructor anticipated to cover  | "I still feel like... I want to cover more, but I want them to understand more. So I feel like sometimes I'm personally challenged by figuring out what, what we should really make sure they understand versus what I had anticipated to get through by the end of this past year." 16205                                                                                                                                                                                                                                                                                                                                                                   |
|                     | Syllabus dictates the content that has to be covered                                                                          | "I guess I stick to a schedule. I don't stick to students and their need to stay on the topic. I stick to the schedule and what we have to cover. So it's, it's schedule-led not student-led." 16208                                                                                                                                                                                                                                                                                                                                                                                                                                                         |
|                     | Felt expectation of content coverage based on course series (ex. Gen Chem 1 & 2)                                              | "I won't skip any chapters, um, for this class because I think everything is important. Um, especially when you have a second semester to take, if you miss one chapter it's gonna probably cause some issues in second semester, um, or even down the line, in the class. Um, so what I'll try to do is we have some, uh, I, I would intentionally leave out things and then I will have, we have review sessions, so I'll have my TA cover that in the review session." 16220                                                                                                                                                                              |
| External Pressure   | Expectation of content coverage in course based on textbook chapters and/or instructor relies on textbook for pace of content | "The syllabus is pretty much standard. Um, so we'll have certain content that we need to teach the class. Right. Um, so it's pretty much determined by that. I've acquired lecture notes from previous instructors just to get a sense of what are things that are important and how much leeway do I have in terms of incorporating new knowledge... Um, but I still try to stick to this textbook that we use, um, finish the first 14 chapters because it's the first semester to second semester, right. So it's pretty much determined by the scope the class that the school defines, but I try to incorporate some new stuff in there as well." 16220 |
|                     | Have to cover what is on the ACS exam                                                                                         | "So that's just based on the ACS exam, so there are certain topics that they require to teach so we just follow it. And then I talk to other senior faculty in our department all from the same division and then they say, oh yeah, so there are certain topics that um it is a must, so we have to cover all the topics." 16226                                                                                                                                                                                                                                                                                                                            |
| Department          | Felt pressure from senior colleagues to cover topics                                                                          | "Based on, uh, the ACS exam so there are certain topics that they require to teach so we just follow it. And then, uh, I talk to other senior faculty in our department all from the same division and then they say, oh yeah, so there are certain topics that um it is a must, so we have to cover all the topics." 16226                                                                                                                                                                                                                                                                                                                                  |
| Course Level        | Perspective varied between course level taught (i.e. undergraduate vs. graduate)                                              | "It should be the latter one, the majority of students should understand, but maybe it depends on the setting. I think in the lecture class, uh, that's what I'd pick, but the undergraduate and graduate and those more specialized topic versus broader topic, it varies." 16203                                                                                                                                                                                                                                                                                                                                                                           |
| Structure of Course | Aimed for alignment of content between lecture and lab                                                                        | "In class I also tried to align some of those lab topics with class, like timing. Um, so I'd say that's another thing I kept thinking about throughout the semester. Like how much time do we spend on each topic. I was trying to align it with what was being covered in the lab simultaneously." 16205                                                                                                                                                                                                                                                                                                                                                    |

| Source of reasoning | Description of reasoning                             | Quote                                                                                                                                                                                                                                               |
|---------------------|------------------------------------------------------|-----------------------------------------------------------------------------------------------------------------------------------------------------------------------------------------------------------------------------------------------------|
|                     | Shared schedule and exams for all sections of course | “Yeah, so I'm kind of in a bind. I can't get through a minority of topics because we have shared exams. And so in the case of shared exams, I have to get through the majority of the topics even if a minority of students understand them.” 16208 |

**Table S5** – Chemistry assistant professors’ reasoning that supports their perspective on content coverage

| Type of factor                                                                                                                | Source of reasoning     | Description of reasoning                                                                                                     | Breadth<br>(n = 1)                                                               | Theoretically depth,<br>but in practice<br>breadth<br>(n = 3) | It<br>depends<br>(n = 1) | Depth<br>(n = 4)        |                         |
|-------------------------------------------------------------------------------------------------------------------------------|-------------------------|------------------------------------------------------------------------------------------------------------------------------|----------------------------------------------------------------------------------|---------------------------------------------------------------|--------------------------|-------------------------|-------------------------|
| Individual                                                                                                                    | Conception of Breadth   | Students will get bored if covering a minority of topics therefore need to cover topics quickly                              | 16208                                                                            |                                                               |                          |                         |                         |
|                                                                                                                               |                         | Focus on core/foundational topics                                                                                            |                                                                                  | 16226                                                         |                          | 16202<br>16204<br>16205 |                         |
|                                                                                                                               |                         | Students get lost in breadth coverage without depth, therefore there is no point to it                                       |                                                                                  | 16209                                                         |                          | 16201<br>16202<br>16204 |                         |
|                                                                                                                               | Conception of Depth     | Application of core/foundation material                                                                                      |                                                                                  |                                                               |                          | 16203                   | 16202<br>16204<br>16205 |
|                                                                                                                               |                         | Adjusted pace based on students not the syllabus/schedule                                                                    |                                                                                  |                                                               |                          |                         | 16202<br>16204<br>16205 |
|                                                                                                                               |                         | Emphasis on application of material                                                                                          |                                                                                  |                                                               | 1626                     |                         | 16201                   |
|                                                                                                                               |                         |                                                                                                                              | Focus on why content is important                                                |                                                               | 16220                    |                         | 16204                   |
|                                                                                                                               | Personal considerations | Reflected on their own learning, how they were taught, or observation of others teaching of the subject                      |                                                                                  |                                                               |                          | 16203                   | 16201<br>16204          |
|                                                                                                                               |                         | Felt need to add introductions to additional content to prepare students for research in graduate school/their career        |                                                                                  |                                                               | 16220<br>16226           |                         |                         |
|                                                                                                                               |                         | Expressed tension in what the instructor wants students to understand versus the content the instructor anticipated to cover |                                                                                  |                                                               |                          |                         | 16205                   |
|                                                                                                                               | Contextual              | External Pressure                                                                                                            | Syllabus dictates the content that has to be covered                             | 16208                                                         | 16220<br>16226           |                         |                         |
|                                                                                                                               |                         |                                                                                                                              | Felt expectation of content coverage based on course series (ex. Gen Chem 1 & 2) |                                                               | 16209<br>16220           |                         |                         |
| Expectation of content coverage in course based on textbook chapters and/or instructor relies on textbook for pace of content |                         |                                                                                                                              |                                                                                  | 16220                                                         |                          | 16203                   |                         |
|                                                                                                                               |                         | Have to cover what is on the ACS exam                                                                                        |                                                                                  | 16226                                                         |                          |                         |                         |
| Department                                                                                                                    |                         | Felt pressure from senior colleagues to cover topics                                                                         |                                                                                  | 16226                                                         |                          |                         |                         |
| Course Level                                                                                                                  |                         | Perspective varied between course                                                                                            |                                                                                  |                                                               |                          | 16203                   |                         |

| Type of factor | Source of reasoning | Description of reasoning                               | Breadth<br>( <i>n</i> = 1) | Theoretically depth,<br>but in practice<br>breadth<br>( <i>n</i> = 3) | It<br>depends<br>( <i>n</i> = 1) | Depth<br>( <i>n</i> = 4) |
|----------------|---------------------|--------------------------------------------------------|----------------------------|-----------------------------------------------------------------------|----------------------------------|--------------------------|
|                |                     | level taught (i.e., undergraduate vs. graduate)        |                            |                                                                       |                                  |                          |
|                | Structure of Course | Aimed for alignment of content between lecture and lab |                            |                                                                       |                                  | 16202<br>16205           |
|                |                     | Shared schedule and exams for all sections of course   | 16208                      |                                                                       |                                  |                          |
